# Supplementary material for: The cortical hem lacks stem cell potential despite expressing SOX9 and HOPX
Source: PubMed Central journal article supplement (PMC9826121; doi:10.1002/dneu.22899), 2022-09-20

A

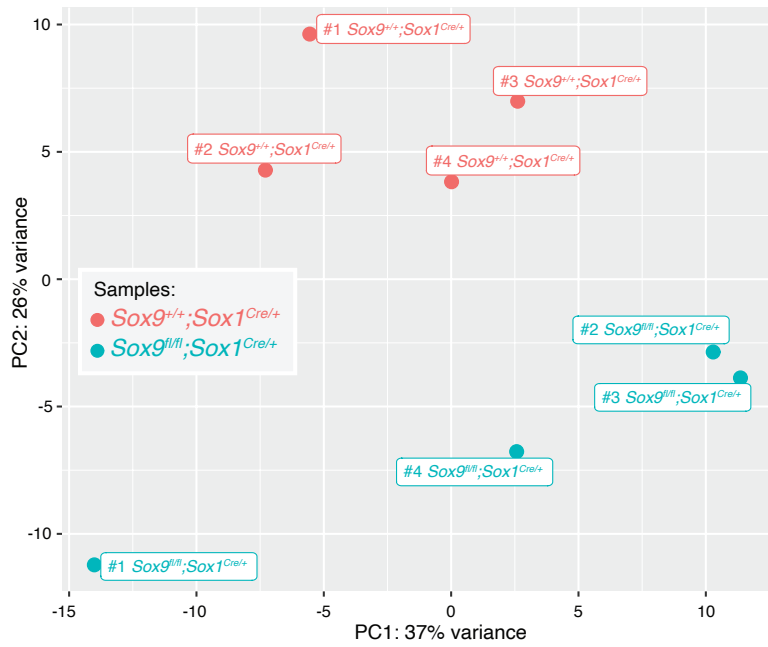

B

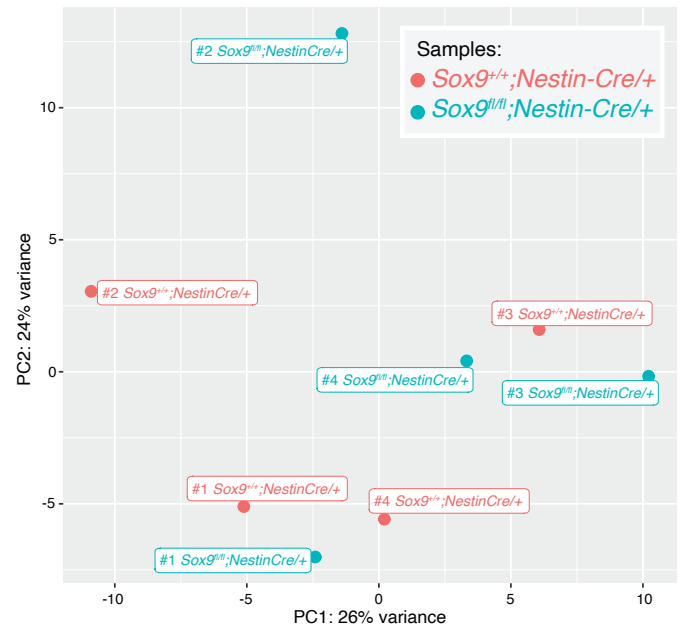

C

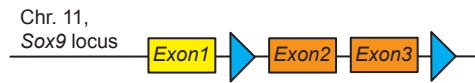

Normalized Exon Counts Sox9

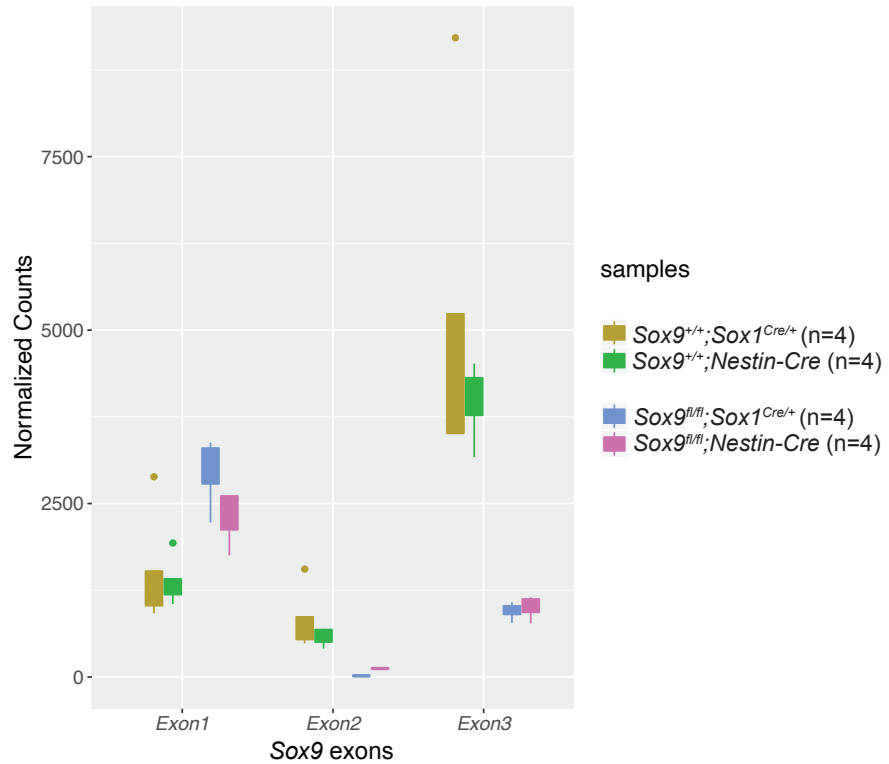

Supplement: DNEU-82-565-s001.pdf [file DNEU-82-565-s001.pdf]
