# Supplementary material for: The cortical hem lacks stem cell potential despite expressing SOX9 and HOPX
Source: PubMed Central journal article supplement (PMC9826121; doi:10.1002/dneu.22899), 2022-09-20

# TOMATO

*Wnt3a<sup>iresCre/+</sup>;R26<sup>Tomato/+</sup>*

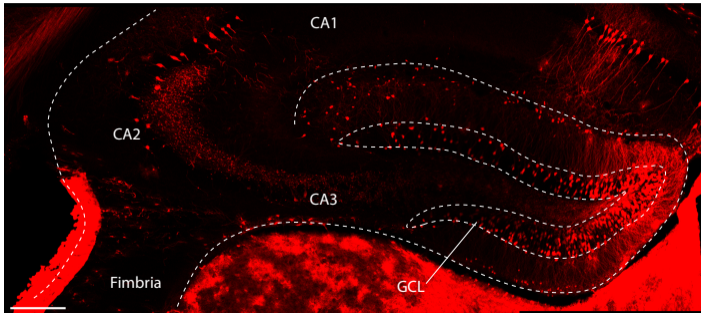

Supplement: DNEU-82-565-s003.pdf [file DNEU-82-565-s003.pdf]
